# Supplementary material for: Atmospheric photooxidation and ozonolysis of Δ 3 -carene and 3-caronaldehyde: Rate constants and product yields
Source: Copernicus journal article supplement (doi:10.5194/acp-2021-340), 2021-04-30
Supplement: Supplementary file 1 [file acp-2021-340-supplement.pdf]

# Supporting Information to “Atmospheric photooxidation and ozonolysis of $\Delta^3$ -carene and 3-carenaldehyde: Rate constants and product yields ”

Luisa Hantschke<sup>1</sup>, Anna Novelli<sup>1</sup>, Birger Bohn<sup>1</sup>, Changmin Cho<sup>1</sup>, David Reimer<sup>1</sup>, Franz Rohrer<sup>1</sup>, Ralf Tillmann<sup>1</sup>, Marvin Glowania<sup>1</sup>, Andreas Hofzumahaus<sup>1</sup>, Astrid Kiendler-Scharr<sup>1</sup>, Andreas Wahner<sup>1</sup>, and Hendrik Fuchs<sup>1</sup>

<sup>1</sup>Institute of Energy and Climate Research, IEK-8: Troposphere, Forschungszentrum Jülich GmbH, Jülich, Germany

**Correspondence:** Hendrik Fuchs  
(h.fuchs@fz-juelich.de)

**Table S1** . Instrumentation for radical and trace gas detection in the experiments.

| <b>measured quantity</b>          | <b>measurement technique</b>               | <b>time<br/>resolution</b> | <b>accuracy<br/>(1 <math>\sigma</math>)</b> |
|-----------------------------------|--------------------------------------------|----------------------------|---------------------------------------------|
| OH                                | laser-induced fluorescence (LIF)           | 47 s                       | 13 %                                        |
| HO <sub>2</sub> , RO <sub>2</sub> | laser-induced fluorescence (LIF)           | 47 s                       | 16 %                                        |
| <i>k</i> <sub>OH</sub>            | laser photolysis + LIF                     | 180 s                      | 10 %                                        |
| $\Delta^3$ -carene                | proton-transfer-reaction mass-spectrometer | 40 s                       | 7 %                                         |
| CO                                | cavity ring-down spectroscopy              | 60 s                       | 1 ppbv                                      |
| NO                                | chemiluminescence                          | 180 s                      | 5 %                                         |
| NO <sub>2</sub>                   | chemiluminescence                          | 180 s                      | 5 %                                         |
| HONO                              | long-path absorption photometry            | 300 s                      | 20 %                                        |
| O <sub>3</sub>                    | UV-absorption                              | 10 s                       | 5 %                                         |
| HCHO                              | Hantzsch monitor                           | 90 s                       | 8.5 %                                       |
| HCHO                              | cavity ring-down spectroscopy              | 300 s                      | 1.5 ppbv                                    |
| photolysis freq.                  | spectroradiometer                          | 60 s                       | 10 %                                        |

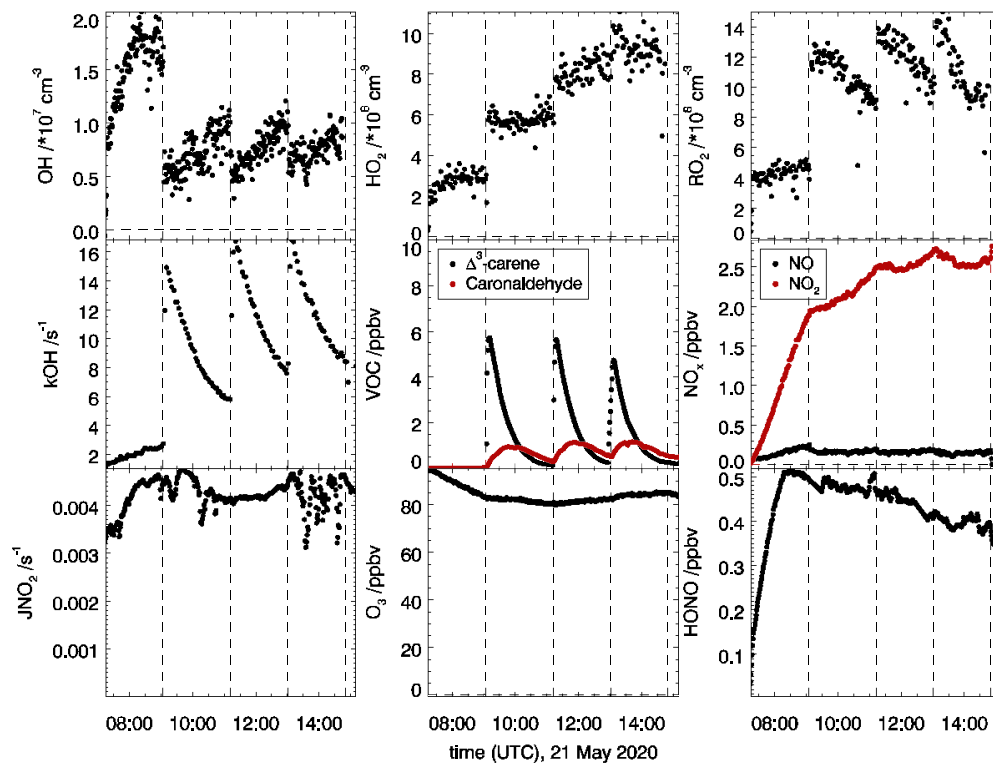

**Figure S1.** Overview of measured concentrations for selected species in the SAPHIR chamber for the  $\Delta^3$ -carene + OH oxidation experiment with low NO<sub>x</sub> conditions on E2. Dashed lines indicate times when  $\Delta^3$ -carene was injected into the chamber.

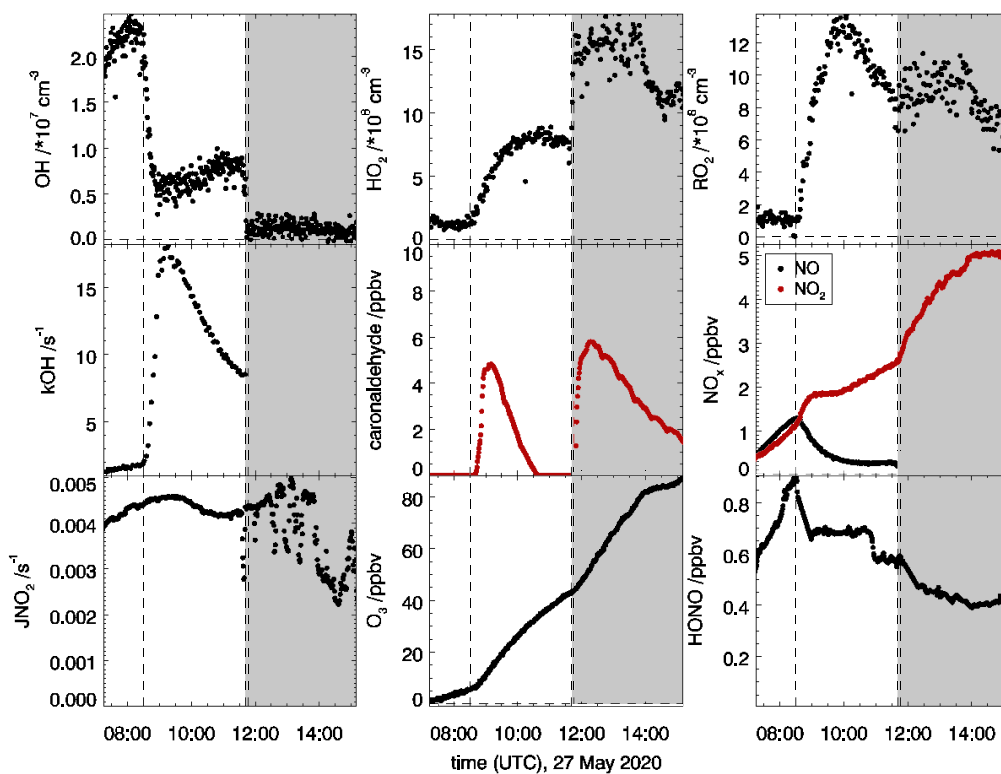

**Figure S2** . Overview of measured concentrations for selected species in the SAPHIR chamber for the coronaldehyde photooxidation experiments E5. The shaded area indicates the time where CO was injected as an OH scavenger (experiment E6). Dashed lines indicate times when coronaldehyde was injected into the chamber.

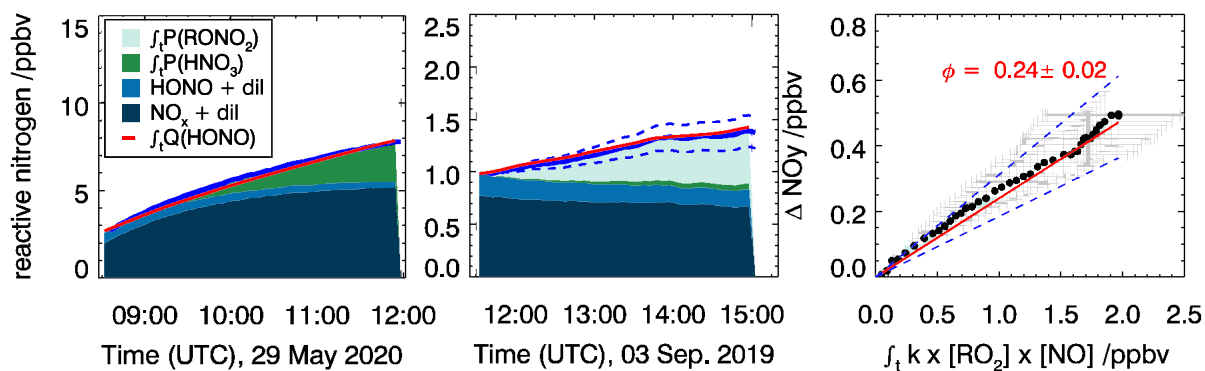

**Figure S3** . Experimental NO<sub>y</sub> budgets for the CH<sub>4</sub> experiment on 29 May 2020 (left) and the  $\alpha$ -pinene experiment on 03 September 2019 (right), shown starting from the first injection of VOC into the chamber until closing of the roof. Dotted lines indicate the injection of VOC into the chamber. The obtained RONO<sub>2</sub> yield of 25.5 % for  $\alpha$ -pinene is a result of the RMSE analysis explained in the text.

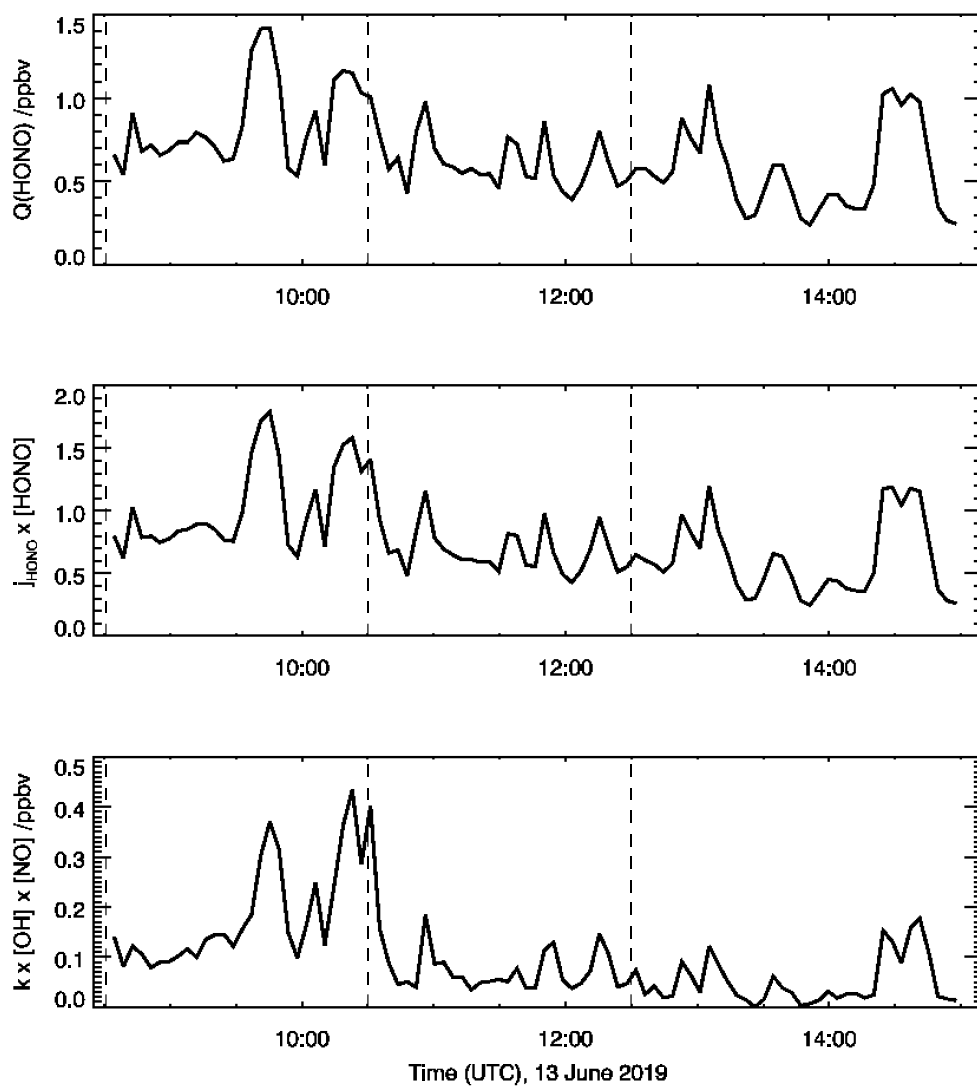

**Figure S4 .** Timeseries of  $Q(\text{HONO})$ ,  $k_{\text{OH}+\text{NO}} \times \text{OH} \times \text{NO}$  and  $j_{\text{HONO}} \times \text{HONO}$  used to calculate the organic nitrate yield of the  $\text{OH} + \Delta^3$ -carene in the main text (see Section 2.5).
